# Supplementary material for: Adsorbate-driven reactive interfacial Pt-NiO1−x nanostructure formation on the Pt3Ni(111) alloy surface
Source: PubMed Central journal article supplement — Sci Adv. 2018 Jul 13;4(7):eaat3151. doi: 10.1126/sciadv.aat3151 (PMC6044734; doi:10.1126/sciadv.aat3151), 2018-07-13
Supplement: aat3151_SM.pdf [file aat3151_SM.pdf]

## Supplementary Materials for

### Adsorbate-driven reactive interfacial Pt-NiO<sub>1-x</sub> nanostructure formation on the Pt<sub>3</sub>Ni(111) alloy surface

Jeongjin Kim, Woong Hyeon Park, Won Hui Doh, Si Woo Lee, Myung Cheol Noh, Jean-Jacques Gallet, Fabrice Bournel, Hiroshi Kondoh, Kazuhiko Mase, Yousung Jung\*, Bongjin Simon Mun\*, Jeong Young Park\*

\*Corresponding author. Email: ysjn@kaist.ac.kr (Y.J.); bsmun@gist.ac.kr (B.S.M.); jeongypark@kaist.ac.kr (J.Y.P.)

Published 13 July 2018, *Sci. Adv.* 4, eaat3151 (2018)  
DOI: 10.1126/sciadv.aat3151

#### The PDF file includes:

##### Supplementary Text

Fig. S1. Formation of the bimetallic domain structures.

Fig. S2. Oxygen-induced surface restructuring.

Fig. S3. Statistical analysis plots for NiO<sub>1-x</sub> clusters.

Fig. S4. Direct observation of the Pt<sub>3</sub>Ni(111) after CO/O<sub>2</sub> gas evacuation.

Fig. S5. AP-XPS analysis at 100 mtorr of O<sub>2</sub>.

Fig. S6. Tracking the mass profiles at room temperature.

Fig. S7. AP-XPS analysis in mixed CO/O<sub>2</sub> gas at elevated temperature.

Fig. S8. Arrhenius plots for catalytic activity measurements.

Fig. S9. Model structures of the interfacial Pt-NiO<sub>1-x</sub> and NiO/Pt<sub>3</sub>Ni.

Fig. S10. Energy profile for CO oxidation on the Pt(111).

Fig. S11. Activation barriers for the CO oxidation reaction (CO\* + O\* → CO<sub>2</sub>) for different O\* configurations on the model surfaces.

Fig. S12. Energy profile for O<sub>2</sub> dissociation on the Pt(111) surface and on the interfacial Pt-NiO<sub>1-x</sub> nanostructure.

Legend for movie S1

#### Other Supplementary Material for this manuscript includes the following:

(available at [advances.sciencemag.org/cgi/content/full/4/7/eaat3151/DC1](https://advances.sciencemag.org/cgi/content/full/4/7/eaat3151/DC1))

Movie S1 (.avi format). Time-lapse AP-STM movie on the Pt<sub>3</sub>Ni(111) surface under mixed CO/O<sub>2</sub> (1:5 ratio) gas at 300 K.

## Supplementary Text

### **Bimetallic Pt-Ni surface on Pt<sub>3</sub>Ni(111) single crystal**

The 'worm-like' surface structures of Pt<sub>3</sub>Ni(111) are one of the characteristic features of bimetallic materials that are created by elemental dislocations along the surface boundaries. The Pt-Ni alloy material has lattice constants of 3.91 Å (Pt) and 3.35 Å (Ni) with an *fcc*-structure for both. The bulk structures for both the Pt and Ni have similar crystallographic geometries and they share an optimized lattice constant for the bulk alloy structure (3.88 Å); however, at least three of the atomic layers along the top of the surface have irregular element compositions because of the preparation or handling methods for the alloyed materials. Consequently, the lattice mismatch between the Pt and Ni atoms is the dominant driving force that continuously leads to the unexpected formation of each domain structure on the Pt<sub>3</sub>Ni(111) surface until the disordered Pt-Ni networks reach a stable thermodynamic energy. During this process, a domain element of the alloying network is lifted or lowered to reduce the surface energy at the boundary using the strain effect. These puzzling atomic-level motions that occur on just a few layers of the bimetallic surface are crucial for constructing the unusual electronic structure, which differs from the well-known properties of single-metal or metal oxide materials.

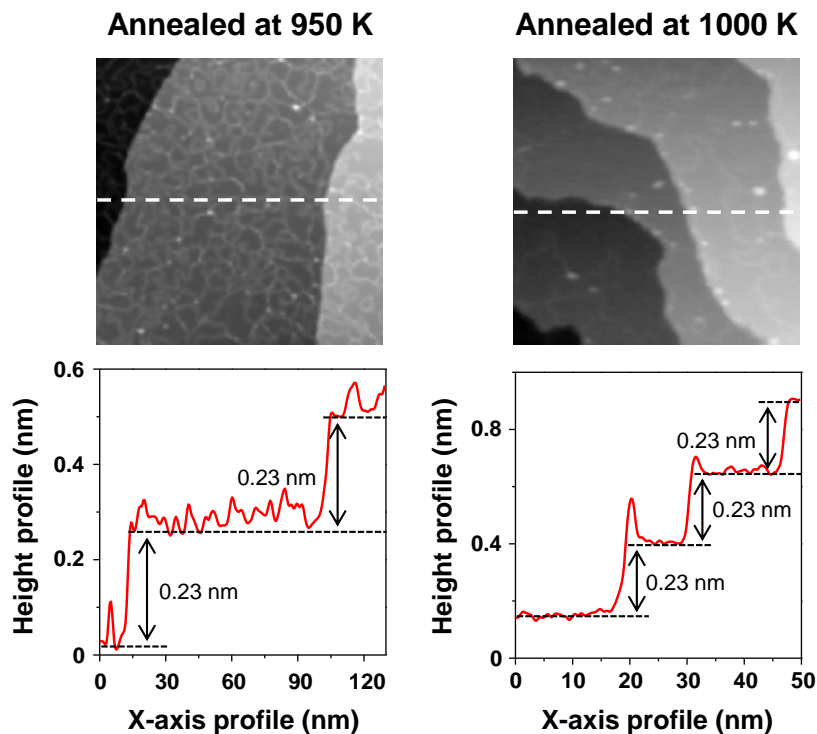

**Fig. S1. Formation of the bimetallic domain structures.** (top) STM images showing the random Pt-Ni domain structures on the Pt<sub>3</sub>Ni(111) surface at UHV and 300 K where the samples were annealed at (left) 950 K [ $V_s = 1.25$  V;  $I_t = 0.26$  nA] and at (right) 1000 K [ $V_s = 1.25$  V;  $I_t = 0.21$  nA]. The faint lines at the domain boundaries on the terrace sites of the pristine Pt<sub>3</sub>Ni(111) surface disappear as a function of annealing temperature in UHV. Both STM images show a clear step-terrace structure consisting of the same monoatomic step heights as Pt(111), as shown in the representative line profiles (bottom).

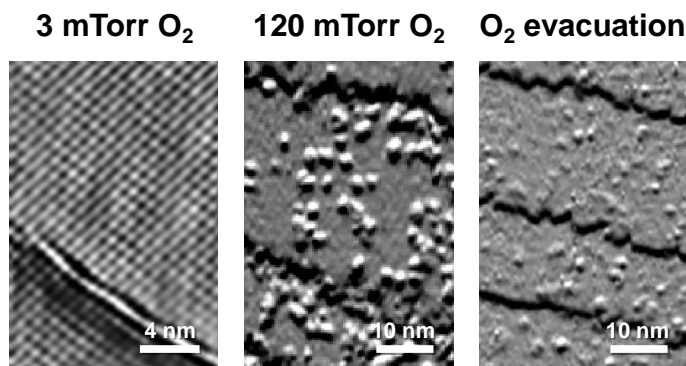

**Fig. S2. Oxygen-induced surface restructuring.** Z-axis differentiated AP-STM images of the oxygen-induced Pt<sub>3</sub>Ni(111) surface at 300 K and 3 mTorr of O<sub>2</sub> [ $V_s = 1.25$  V;  $I_t = 0.200$  nA], 120 mTorr of O<sub>2</sub> [ $V_s = 1.40$  V;  $I_t = 0.280$  nA], and O<sub>2</sub> evacuation [ $V_s = 1.25$  V;  $I_t = 0.160$  nA]. The dissociated oxygen is adsorbed on the topmost Pt-skin layer of the Pt<sub>3</sub>Ni(111). At 3 mTorr of O<sub>2</sub>, a chemisorbed  $p(2 \times 2)$ -O structure forms on the surface. At 120 mTorr of O<sub>2</sub>, segregated Ni oxide clusters are clearly seen on the AP-STM image. The clusters remained on the Pt<sub>3</sub>Ni(111) surface after O<sub>2</sub> evacuation.

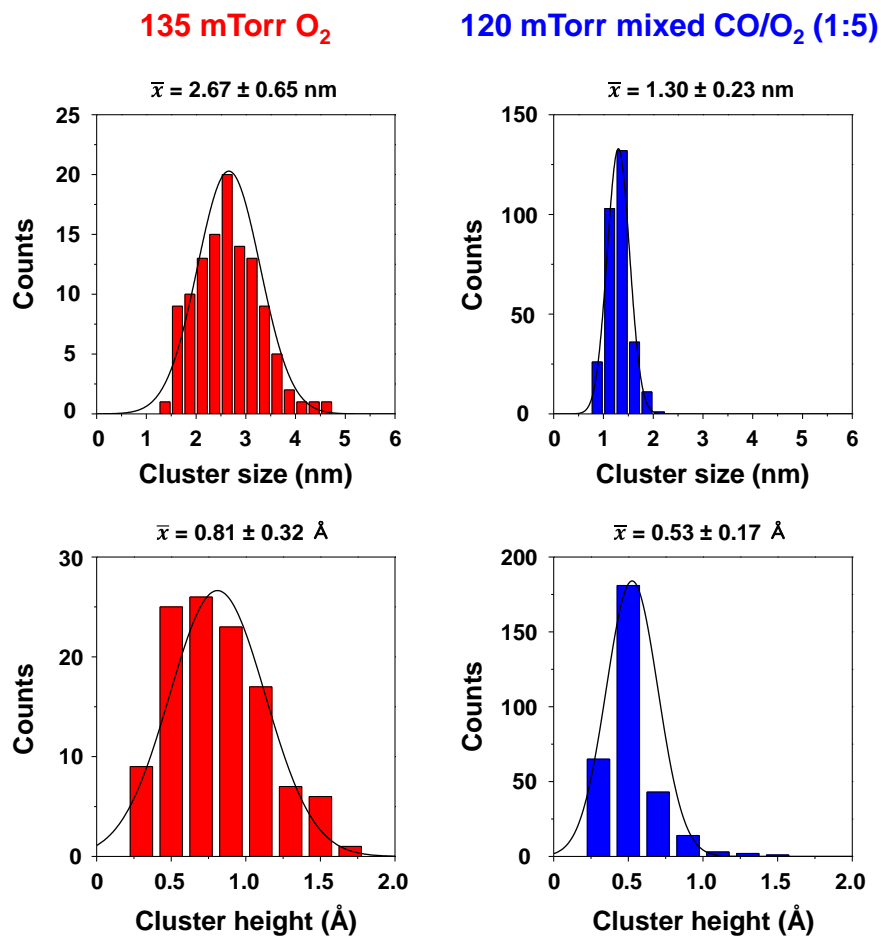

**Fig. S3. Statistical analysis plots for NiO<sub>1-x</sub> clusters.** Cluster size and height distributions of the NiO<sub>1-x</sub> clusters evolved on the Pt<sub>3</sub>Ni(111) surface at 300 K under (left) 135 mTorr of O<sub>2</sub> and (right) 120 mTorr of mixed CO/O<sub>2</sub> (1:5 ratio) gas, obtained from STM images.

After CO/O<sub>2</sub> gas evacuation

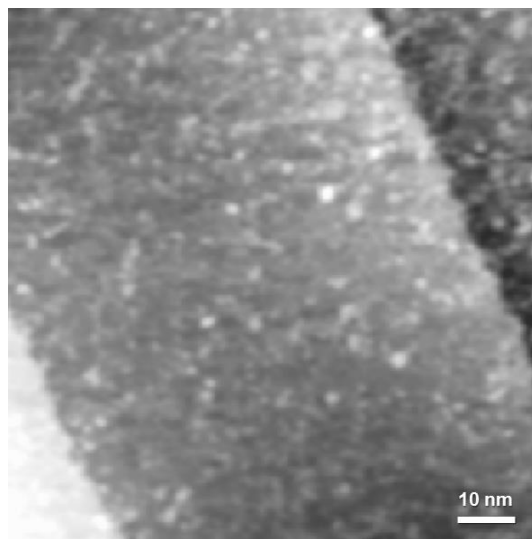

**Fig. S4. Direct observation of the Pt<sub>3</sub>Ni(111) after CO/O<sub>2</sub> gas evacuation.** STM image on the Pt<sub>3</sub>Ni(111) surface taken at UHV after the experiment with 120 mTorr of mixed CO/O<sub>2</sub> (1:5) gas [ $V_s = 1.40$  V;  $I_t = 0.330$  nA].

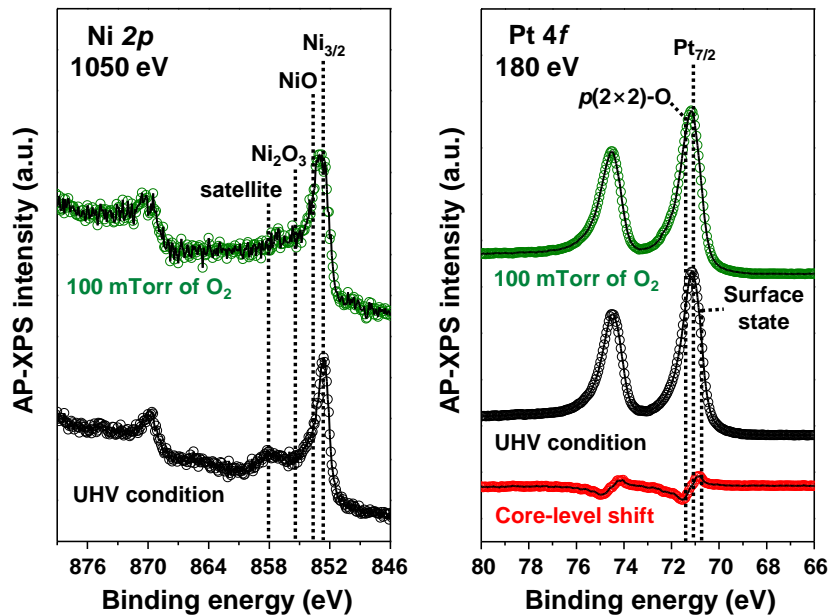

**Fig. S5. AP-XPS analysis at 100 mTorr of O<sub>2</sub>.** AP-XPS core-level spectra for Ni 2p ( $h\nu = 1050$  eV) and for Pt 4f ( $h\nu = 180$  eV) on the Pt<sub>3</sub>Ni(111) surface at 300 K in UHV (black) and 100 mTorr of O<sub>2</sub> (green). The core-level shift for the Pt 4f spectra (red) is also plotted to show the detailed spectral changes by spectrum subtraction (UHV condition – 100 mTorr of O<sub>2</sub>).

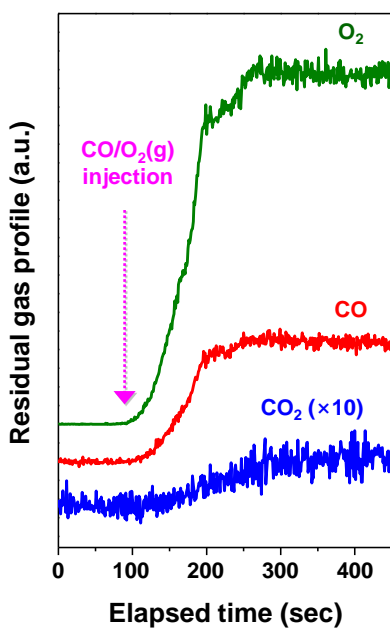

**Fig. S6. Tracking the mass profiles at room temperature.** Residual gas analysis plot on the Pt<sub>3</sub>Ni(111) surface at 100 mTorr of mixed CO/O<sub>2</sub> (1:5) gas at 300 K. The traced mass spectrometry profiles are CO ( $m/z = 28$ ), O<sub>2</sub> ( $m/z = 32$ ), and CO<sub>2</sub> ( $m/z = 44$ ).

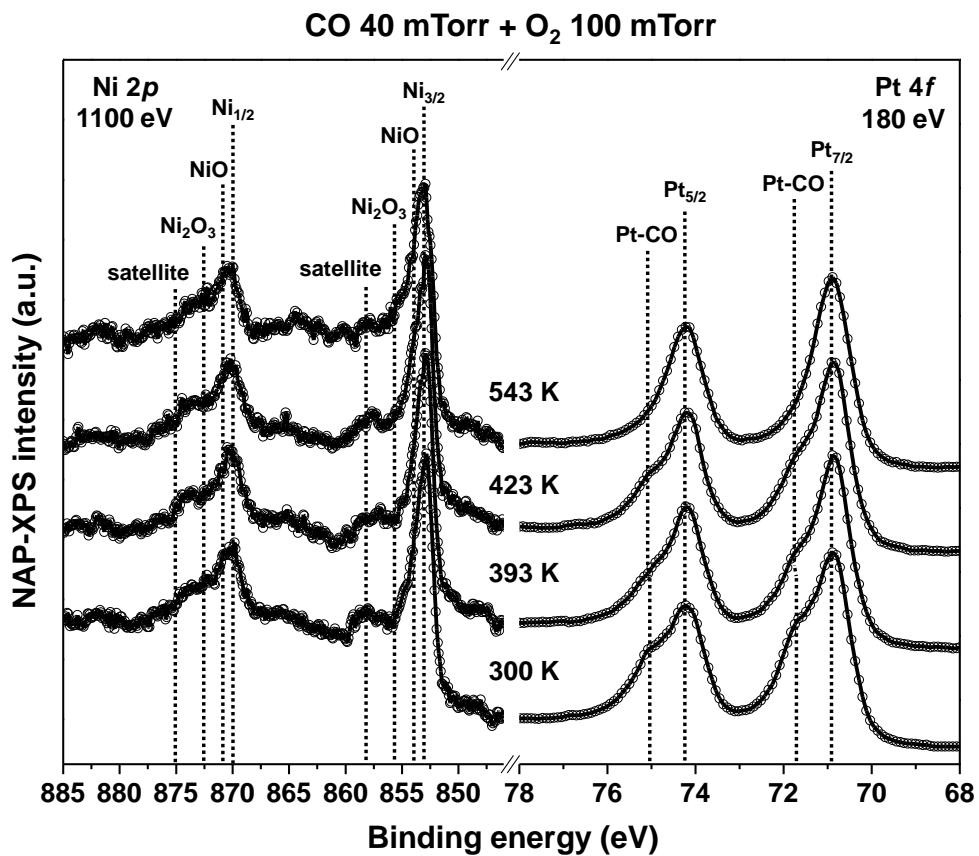

**Fig. S7. AP-XPS analysis in mixed CO/O<sub>2</sub> gas at elevated temperature.** AP-XPS core-level spectra for Ni 2p ( $h\nu = 1100$  eV) and Pt 4f ( $h\nu = 180$  eV) on the Pt<sub>3</sub>Ni(111) surface under 40 mTorr of CO and 100 mTorr of O<sub>2</sub> mixed gas (1:2.5) at elevated temperatures.

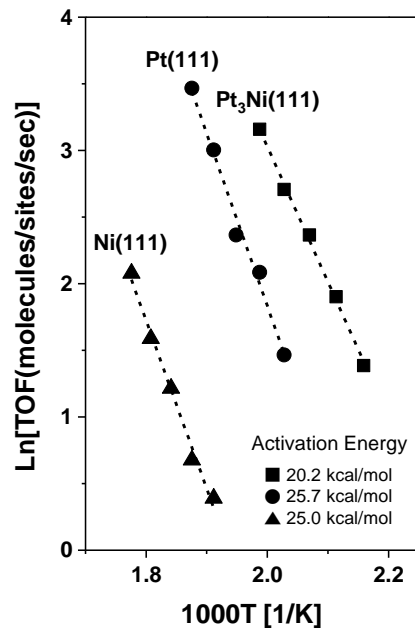

**Fig. S8. Arrhenius plots for catalytic activity measurements.** Each turnover frequency (TOF) number for Pt<sub>3</sub>Ni(111), Pt(111), and Ni(111) was measured under mixed gas (40 Torr CO/100 Torr O<sub>2</sub>/620 Torr He) in a batch reactor.

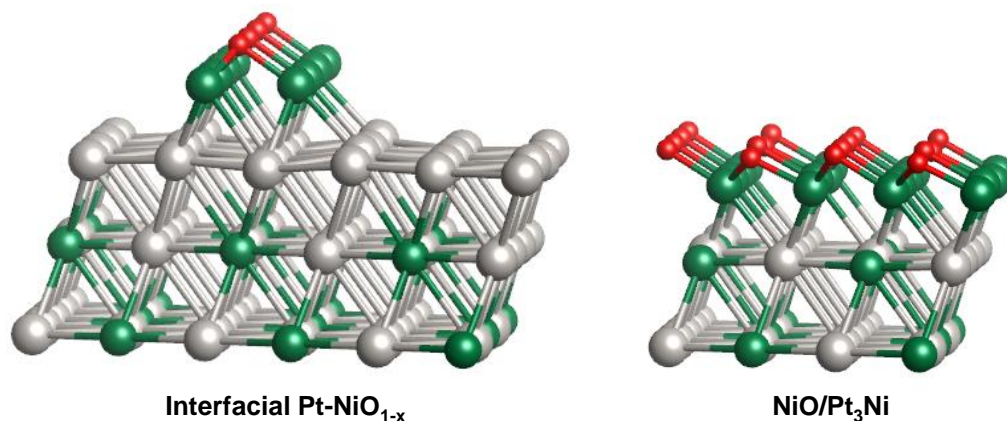

**Fig. S9. Model structures of the interfacial Pt-NiO<sub>1-x</sub> and NiO/Pt<sub>3</sub>Ni.** DFT calculation models for CO oxidation over (left) the interfacial Pt-NiO<sub>1-x</sub> and (right) NiO on the stoichiometric Pt<sub>3</sub>Ni structure. The colors of each atom in the model are Pt (light-gray), Ni (green), and O (red).



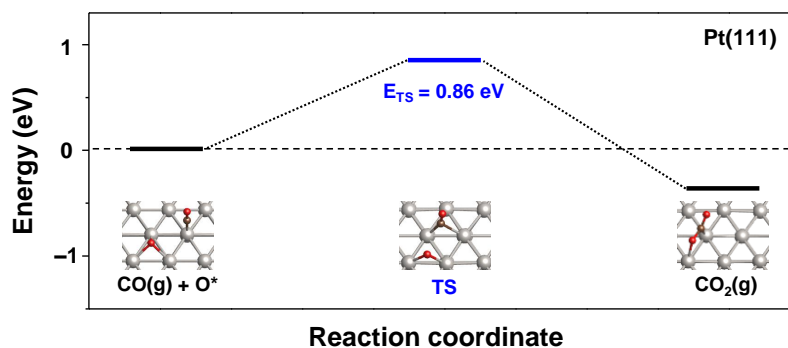

**Fig. S10. Energy profile for CO oxidation on the Pt(111).** DFT calculation results for the chemical reaction pathway for CO oxidation on the Pt(111) surface. The optimized minimum and transition state (TS) structures are shown in black and blue, respectively. The adsorbed species are denoted with asterisks (\*). The colors of each atom in the model are Pt (light-grey), O (red), and C (brown).

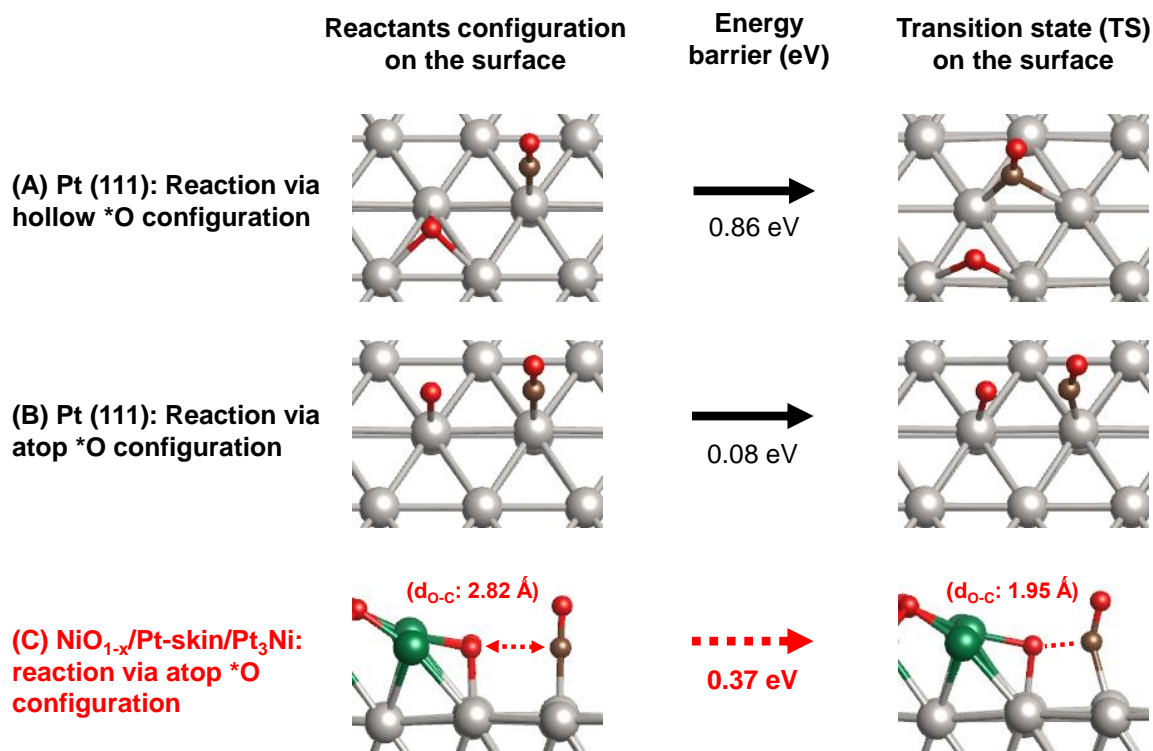

**Fig. S11. Activation barriers for the CO oxidation reaction ( $\text{CO}^* + \text{O}^* \rightarrow \text{CO}_2$ ) for different  $\text{O}^*$  configurations on the model surfaces.** (A) Lowest-energy hollow  $\text{O}^*$  configuration on the Pt(111) surface, (B) atop  $\text{O}^*$  configuration (local minimum) on the Pt(111) surface, and (C) atop  $\text{O}^*$  configuration at the NiO<sub>1-x</sub>/Pt-skin/Pt<sub>3</sub>Ni interface. When  $\text{O}^*$  is at the atop site, as in (B) and (C), the  $\text{O}^*$ -metal and  $\text{CO}^*$ -metal bonds undergo less rearrangement/rupture during the reaction to reach TS (the early transition state) with a reduced reaction barrier.

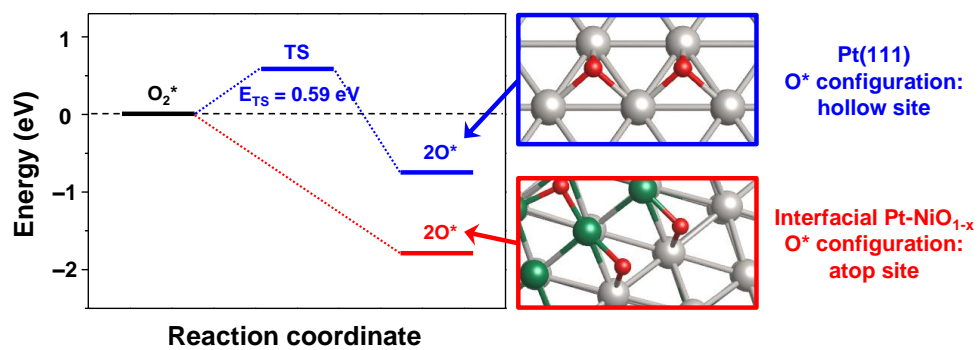

**Fig. S12. Energy profile for O<sub>2</sub> dissociation on the Pt(111) surface and on the interfacial Pt-NiO<sub>1-x</sub> nanostructure.** Each optimized structure for dissociated oxygen (O\*) adsorption on Pt(111) and the interfacial Pt-NiO<sub>1-x</sub> nanostructure is shown as an atomistic model (right panel, top and bottom, respectively).

**Movie S1. Time-lapse AP-STM movie on the Pt<sub>3</sub>Ni(111) surface under mixed CO/O<sub>2</sub> (1:5 ratio) gas at 300 K.**
